# Supplementary material
Source: ML conference proceedings conference paper supplement (https://openaccess.thecvf.com/content/WACV2024/html/Gupta_Torque_Based_Structured_WACV_2024_paper.html)
Supplement: Supplementary file 1 [file Gupta_Torque_Based_Structured_WACV_2024_supplemental.pdf]

# Supplementary: Torque based Structured Pruning for Deep Neural Network

## 1. Supplementary

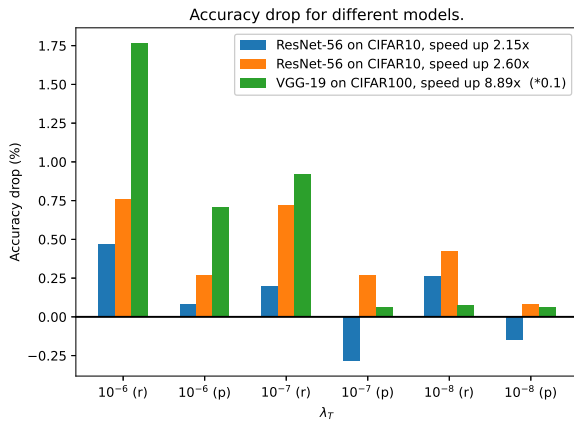

Figure 1. weight matrix of Layer 14 of VGG-19 trained on CIFAR-100. Each element in this matrix is a 2D kernel.

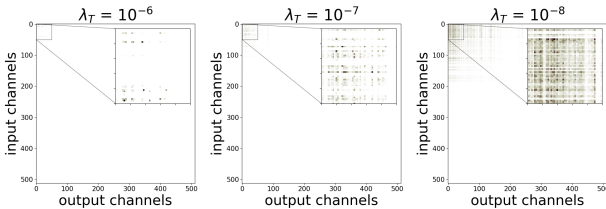

Figure 2. weight matrix of Layer 14 of VGG-19 trained on CIFAR-100. Each element in this matrix is a 2D kernel.

In Figure 1, we provide our analysis when training our model with different values of  $\lambda_T$  for both (r) and (p). Specifically, we experiment with three different  $\lambda_T = 10^{-6}$ ,  $\lambda_T = 10^{-7}$  and  $\lambda_T = 10^{-8}$  for different model architectures at different speedup. (Note: we have scaled the values of VGG-19 on CIFAR100 by 0.1 in order for easier insight). As already mentioned in the main paper, all above models perform exceptionally well initialized with pre-trained model as compared to randomly initialized. Additionally, for most of the networks we observe  $\lambda_T = 10^{-7}$  and  $\lambda_T = 10^{-8}$  performance to be superior than  $\lambda_T = 10^{-6}$ .

We especially noticed that when the VGG-19 model is randomly initialized and trained with  $\lambda_T = 10^{-6}$  on CIFAR-100 dataset, we see significant drop in performance. On further analysis of the VGG-19 layers trained with different  $\lambda_T$ , we observed at high value of  $\lambda_T$ , the constraint is too strong and the model is unable to recover from such strong damage. Figure 2 shows layer-14 of VGG-19 after torque training process.
